# Supplementary material for: Offending behaviour, health and wellbeing of military veterans in the criminal justice system
Source: PLoS One. 2018 Nov 9;13(11):e0207282. doi: 10.1371/journal.pone.0207282 (PMC6226174; doi:10.1371/journal.pone.0207282)
Supplement: S1 Table — (XLSX) [file pone.0207282.s001.xlsx]

## Sheet: Sheet1
		Other offencesa (N=475)	Violence against the person (N=396)
		N (%*)	N (%*)	OR [95% CI]	p	aOR [95% CI]†	p
Gender
	Female	18 (3.79)	11 (2.78)	1	-	1	-
	Male	453 (95.37)	384 (96.97)	1.39 [0.65-2.97]	0.4	0.93 [0.42-2.04]	0.85245
Age
	25 & Under	39 (8.21)	41 (10.35)	1	-	1	-
	26-35	163 (34.32)	103 (26.01)	0.60 [0.36-0.99]	0.0473359	0.61 [0.37-1.00]	0.0487097
	36-45	117 (24.63)	116 (29.29)	0.94 [0.57-1.57]	0.821175	0.88 [0.53-1.46]	0.616219
	46-55	90 (18.95)	88 (22.22)	0.93 [0.55-1.58]	0.787787	0.80 [0.47-1.37]	0.424249
	56-65	41 (8.63)	16 (4.04)	0.37 [0.18-0.77]	0.00740299	0.35 [0.16-0.76]	0.00794598
	Over 65	22 (4.63)	31 (7.83)	1.34 [0.67-2.70]	0.412446	0.50 [0.19-1.31]	0.158126
Ethnicity
	BME	27 (5.68)	25 (6.31)	1	-	1	-
	White	436 (91.79)	364 (91.92)	0.90 [0.51-1.58]	0.72	0.90 [0.51-1.57]	0.708594
Employment status
	Employed	138 (29.05)	132 (33.33)	1.44 [1.05-1.97]	0.02	1.22 [0.89-1.68]	0.215081
	Unemployed	233 (49.05)	155 (39.14)	1	-	1	-
	Sickness/disability	47 (9.89)	46 (11.62)	1.47 [0.93-2.32]	0.1	1.29 [0.83-1.99]	0.262153
	Retired	27 (5.68)	37 (9.34)	2.06 [1.21-3.52]	<0.01	2.33 [1.03-5.27]	0.0423512
	Other	9 (1.89)	9 (2.27)	1.50 [0.58-3.87]	0.4	1.54 [0.61-3.89]	0.36128
Accommodation status
	Homeless	55 (11.58)	31 (7.83)	0.60 [0.37-0.96]	0.03	0.78 [0.49-1.25]	0.304663
	Temporary	36 (7.58)	24 (6.06)	0.71 [0.41-1.22]	0.21	0.80 [0.47-1.37]	0.418004
	Own/Rent	271 (57.05)	255 (64.39)	1	-	1	-
	Parent/Family	60 (12.63)	38 (9.60)	0.67 [0.43-1.05]	0.08	0.69 [0.45-1.07]	0.1
	Other	15 (3.16)	12 (3.03)	0.85 [0.39-1.85]	0.68	0.64 [0.30-1.35]	0.24
† Adjusted odds ratio: adjusted for gender, age, ethnicity, employment status and accommodation status. * Percentages may not add up to 100 due to missing data. a All other non-violent and non-sexual offences.
